# Supplementary material for: Facilitators and barriers for the implementation of exercise are medicine in routine clinical care in Dutch university medical centres: a mixed methodology study on clinicians’ perceptions
Source: HighWire-hosted journal article supplement (doi:10.1136/bmjopen-2021-052920), 2022-03-01
Supplement: bmjopen-2021-052920supp003_data_supplement.pdf [file bmjopen-2021-052920supp003_data_supplement.pdf]

Appendix 3 – answers to the questions that were not described in the results section (question 13 & 15).

Who in your department does refer patients in the context of an active lifestyle?

|                                                                                                                                                       | Amsterdam<br>UMC (n=12) | UMCG (n=33) |
|-------------------------------------------------------------------------------------------------------------------------------------------------------|-------------------------|-------------|
| <b>Who in your department does refer patients in the context of an active lifestyle? (multiple answers possible)</b>                                  |                         |             |
| Medical physicians                                                                                                                                    | 92%                     | 82%         |
| Specialist registrars                                                                                                                                 | 92%                     | 76%         |
| Nursing specialists                                                                                                                                   | 42%                     | 52%         |
| Physician assistants                                                                                                                                  | 25%                     | 52%         |
| Physiotherapist                                                                                                                                       | 67%                     | 48%         |
| Lifestyle coach                                                                                                                                       | 0%                      | 12%         |
| Nurse                                                                                                                                                 | 0%                      | 0%          |
| Medical administrative staff                                                                                                                          | 0%                      | 0%          |
| I don't know                                                                                                                                          | 8%                      | 15%         |
| Other                                                                                                                                                 | 0%                      | 3%          |
| <b>Who in your department does refer patients in the context of an active lifestyle? (multiple answers possible)</b>                                  |                         |             |
| I have no insight into the referral / exercise options for my patients                                                                                | 0%                      | 9%          |
| Regular physical activity options (fitness center or (un)organized sports)                                                                            | 67%                     | 67%         |
| Low-threshold physical activity options (elderly gymnastics or walking groups in the area)                                                            | 42%                     | 24%         |
| Specific referral to a physiotherapist and / or an exercise program at the physiotherapist                                                            | 83%                     | 52%         |
| A "exercise broker" (such as Sports and exercise counter of a rehabilitation center, a neighborhood sports coach or combination officer)              | 8%                      | 33%         |
| A combined lifestyle intervention (Exercise cure, COOL, SMARTER!)                                                                                     | 8%                      | 0%          |
| Self-organized physical activity (such as walking, jogging, but also gardening, walking (with the dog) or cycling) in free time                       | 67%                     | 61%         |
| Active commuting                                                                                                                                      | 33%                     | 21%         |
| Lifestyle consultant within the department or in the hospital (for example the Lifestyle Guide within the Sport Medical Center within UMCG)           | NA                      | 30%         |
| A sports physician / sports medical institution for exercise diagnostics / risk analysis in combination with personalized exercise / training advice. | 8%                      | 12%         |
| the Exercise Coach + (only at UMCG)                                                                                                                   | NA                      | 12%         |
| Physiotherapist within the hospital                                                                                                                   | 25%                     | 0%          |
| Other                                                                                                                                                 | 8%                      | 3%          |
